# Supplementary material
Source: Springer Nature journal article supplement (https://www.springermedizin.de/resource/supplementary/13075_2009_2751_MOESM7_ESM.pdf/9692804)

Controls

Arthritis

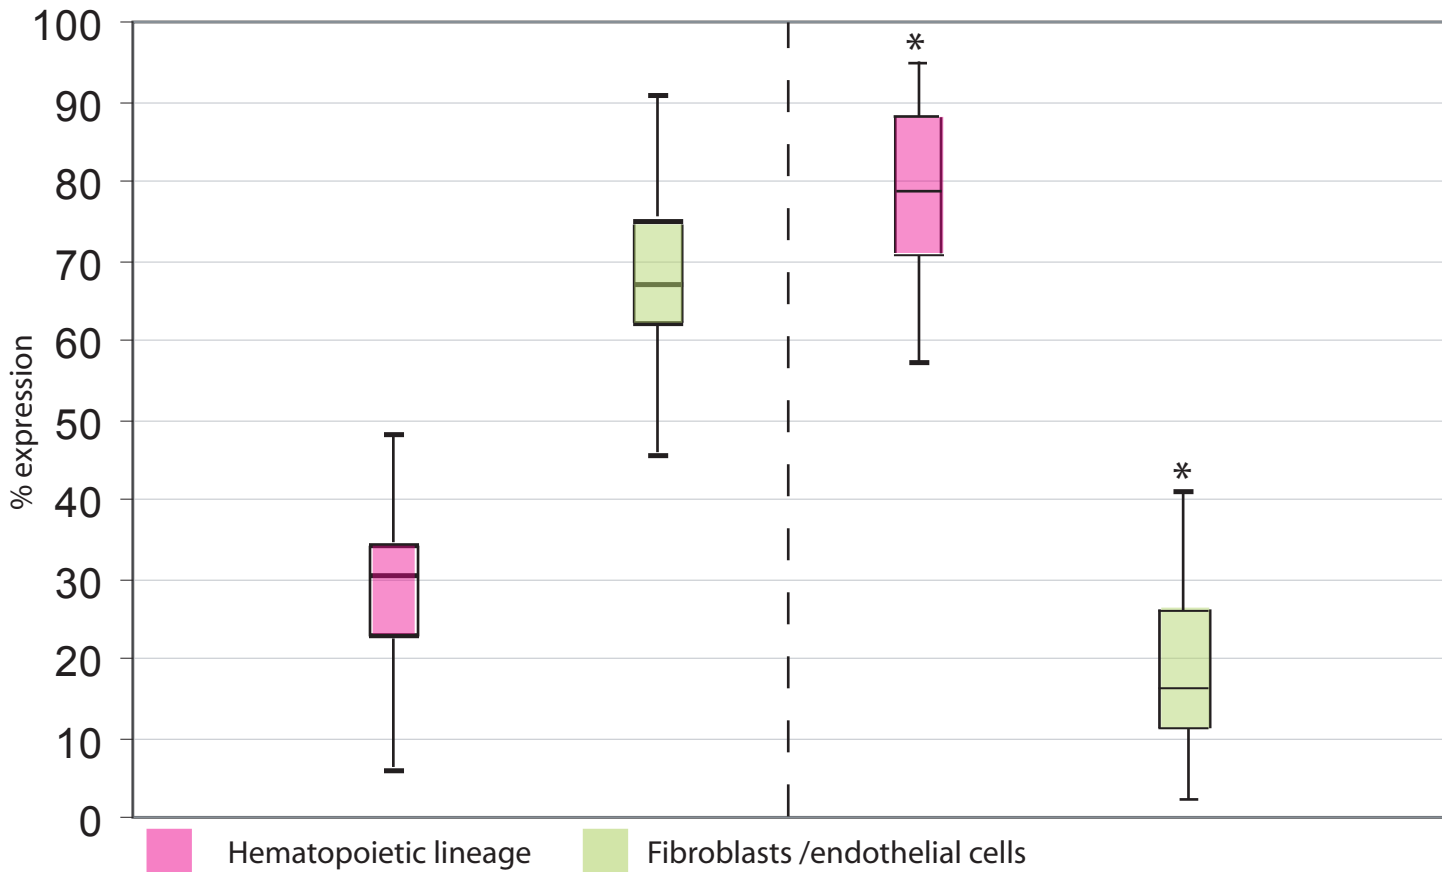

Supplement: MOESM7 [file 9692804]
